# Supplementary material for: Evaluation of enzymatically crosslinked injectable glycol chitosan hydrogel
Source: Royal Society of Chemistry journal article supplement (doi:10.1039/c5tb00663e), 2015-01-01
Supplement: c5tb00663e1.pdf [file c5tb00663e1.pdf]

### Supplementary Data

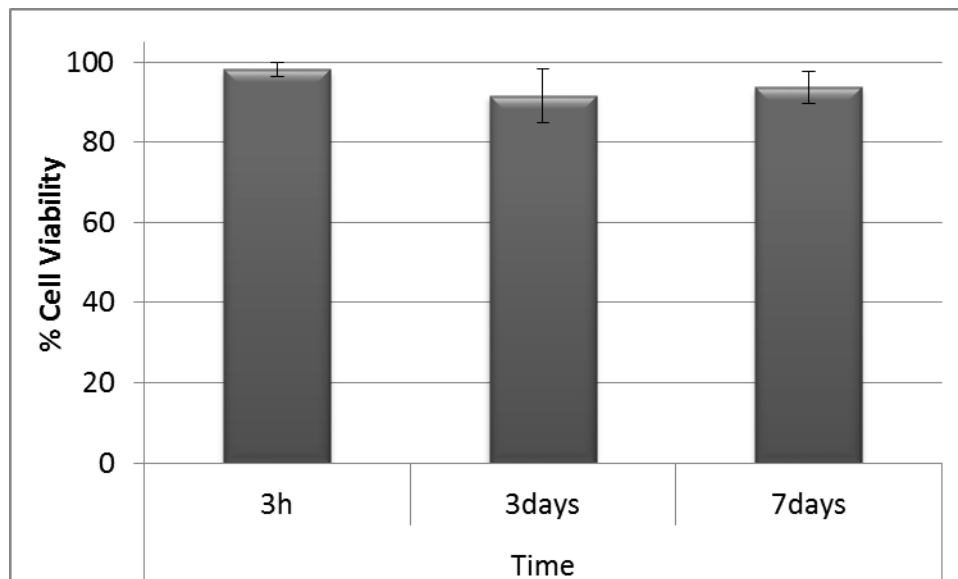

**Supplementary figure S1:** Percent cell viability of 7F2 osteoblasts determined by live dead assay after 3h, 3days and 7 days of *in situ* gelation.

No significant difference in cell viability was observed at the tested time points (3 h, 3 days and 7 days). One way ANOVA followed by Student Newman Keuls test,  $n=3$  gels at each time point, 4 images per gel. The number of live (green) and dead (red) cells were determined using ImageJ software and used to determine the % cell viability at each tested time point.
